# Supplementary material for: Surface chiroselective assembly of enantiopure crystalline porous films containing bichiral building blocks
Source: Royal Society of Chemistry journal article supplement (doi:10.1039/d1sc03089b), 2021-01-01
Supplement: d1sc03089b1.pdf [file d1sc03089b1.pdf]

**Electronic Supplementary Information (ESI)**

**Surface Chiroselective Assembly of Enantiopure Crystalline  
Porous Films Containing Bichiral Building Blocks**

*Hao Chen<sup>ac</sup>, Zhi-Gang Gu<sup>\*abc</sup> and Jian Zhang<sup>\*abc</sup>*

<sup>a</sup> State Key Laboratory of Structural Chemistry, Fujian Institute of Research on the Structure of Matter, Chinese Academy of Sciences, Fuzhou, Fujian 350002, P. R. China

<sup>b</sup> Fujian Science & Technology Innovation Laboratory for Optoelectronic Information of China, Fuzhou, Fujian 350108, P. R. China

<sup>c</sup> University of Chinese Academy of Sciences, Beijing 100049, P.R. China

Address correspondence to [zggu@fjirsm.ac.cn](mailto:zggu@fjirsm.ac.cn) and [zhj@fjirsm.ac.cn](mailto:zhj@fjirsm.ac.cn)

## Table of Contents

|                                                                                                                                                                                                                                                                                                                                               |
|-----------------------------------------------------------------------------------------------------------------------------------------------------------------------------------------------------------------------------------------------------------------------------------------------------------------------------------------------|
| <b>Figure S1.</b> (a) Structures of the $\Delta$ -Ti <sub>4</sub> L <sub>6</sub> and $\Lambda$ -Ti <sub>4</sub> L <sub>6</sub> isomers in racemic Ti <sub>4</sub> L <sub>6</sub> cages; (b) Model structures of the ( <i>R</i> )- and ( <i>S</i> )-DCH (DCH = 1,2-diaminocyclohexane) units.                                                  |
| <b>Figure S2.</b> Two adjacent $\Delta$ -Ti <sub>4</sub> L <sub>6</sub> cages linked by one ( <i>R</i> )-Mn(DCH) <sub>3</sub> unit through N–H···O hydrogen bonds.                                                                                                                                                                            |
| <b>Figure S3.</b> Structures of the ( <i>R</i> , $\Delta$ )-CPM film along [111] orientation.                                                                                                                                                                                                                                                 |
| <b>Figure S4.</b> The preparation diagrammatic sketch of ( <i>S</i> , $\Lambda$ )-CPM film by the autoarm immersion layer-by-layer assembly method.                                                                                                                                                                                           |
| <b>Figure S5.</b> IR spectra of racemic Ti <sub>4</sub> L <sub>6</sub> , ( <i>R</i> )-DCH, ( <i>R</i> , $\Delta$ )- and ( <i>S</i> , $\Lambda$ )-CPM films.                                                                                                                                                                                   |
| <b>Figure S6.</b> UV-vis spectra of ( <i>R</i> , $\Delta$ )- and ( <i>S</i> , $\Lambda$ )-CPM films and powder of ( <i>R</i> , $\Delta$ )-CPM.                                                                                                                                                                                                |
| <b>Figure S7.</b> SEM EDS of ( <i>R</i> , $\Delta$ )-CPM film.                                                                                                                                                                                                                                                                                |
| <b>Figure S8.</b> Survey XPS spectra of ( <i>R</i> , $\Delta$ )- and ( <i>S</i> , $\Lambda$ )-CPM films and powder of ( <i>R</i> , $\Delta$ )-CPM.                                                                                                                                                                                            |
| <b>Figure S9.</b> The high resolution of XPS: Mn 2p XPS spectra of ( <i>R</i> , $\Delta$ )-CPM film (a), ( <i>S</i> , $\Lambda$ )-CPM film (b) and powder of ( <i>R</i> , $\Delta$ )-CPM (c); Ti 2p XPS spectra of ( <i>R</i> , $\Delta$ )-CPM film (d), ( <i>S</i> , $\Lambda$ )-CPM film (e) and powder of ( <i>R</i> , $\Delta$ )-CPM (f). |
| <b>Figure S10.</b> (a) Surface and cross-sectional SEM images of ( <i>R</i> , $\Delta$ )-CPM-20, ( <i>R</i> , $\Delta$ )-CPM-30 (b) and ( <i>R</i> , $\Delta$ )-CPM-40 (c).                                                                                                                                                                   |
| <b>Figure S11.</b> Plot of ( <i>R</i> , $\Delta$ )-CPM film thickness versus preparation cycles.                                                                                                                                                                                                                                              |
| <b>Figure S12.</b> Plot of ( <i>R</i> , $\Delta$ )-CPM film CD peak at 360 nm versus preparation cycles.                                                                                                                                                                                                                                      |
| <b>Figure S13.</b> The CD liquid-state spectra of ( <i>R</i> , $\Delta$ ) and ( <i>S</i> , $\Lambda$ )-CPM in ethanolic solution.                                                                                                                                                                                                             |

**Figure S14.** The CD liquid-state spectra of (*R*)- and (*S*)-Mn(DCH)<sub>3</sub>, (*R*)- and (*S*)-DCH in ethanolic solution.

**Figure S15.** CPL dissymmetry factor ( $g_{lum}$ ) spectra of (*R*,  $\Delta$ )- and (*S*,  $\Lambda$ )-CPM films (excitation at 365 nm).

**Figure S16.** Mass uptakes of *D*- and *L*-methyl lactate in (*R*,  $\Delta$ )- (a) and (*S*,  $\Lambda$ )-CPM films (b) using by a gas phase QCM technique; Mass uptakes (c) and enantioselectivity (d) of *D*- and *L*-methyl lactate in (*R*,  $\Delta$ )- and (*S*,  $\Lambda$ )-CPM films.

**Figure S17.** SEM images (a, b), AFM image (c), SEM EDS (d) and element mapping (e) of (*S*,  $\Lambda$ )-CPM film.

**Figure S18.** The liquid-state CD spectra of racemic Ti<sub>4</sub>L<sub>6</sub> cages in ethanolic solution.

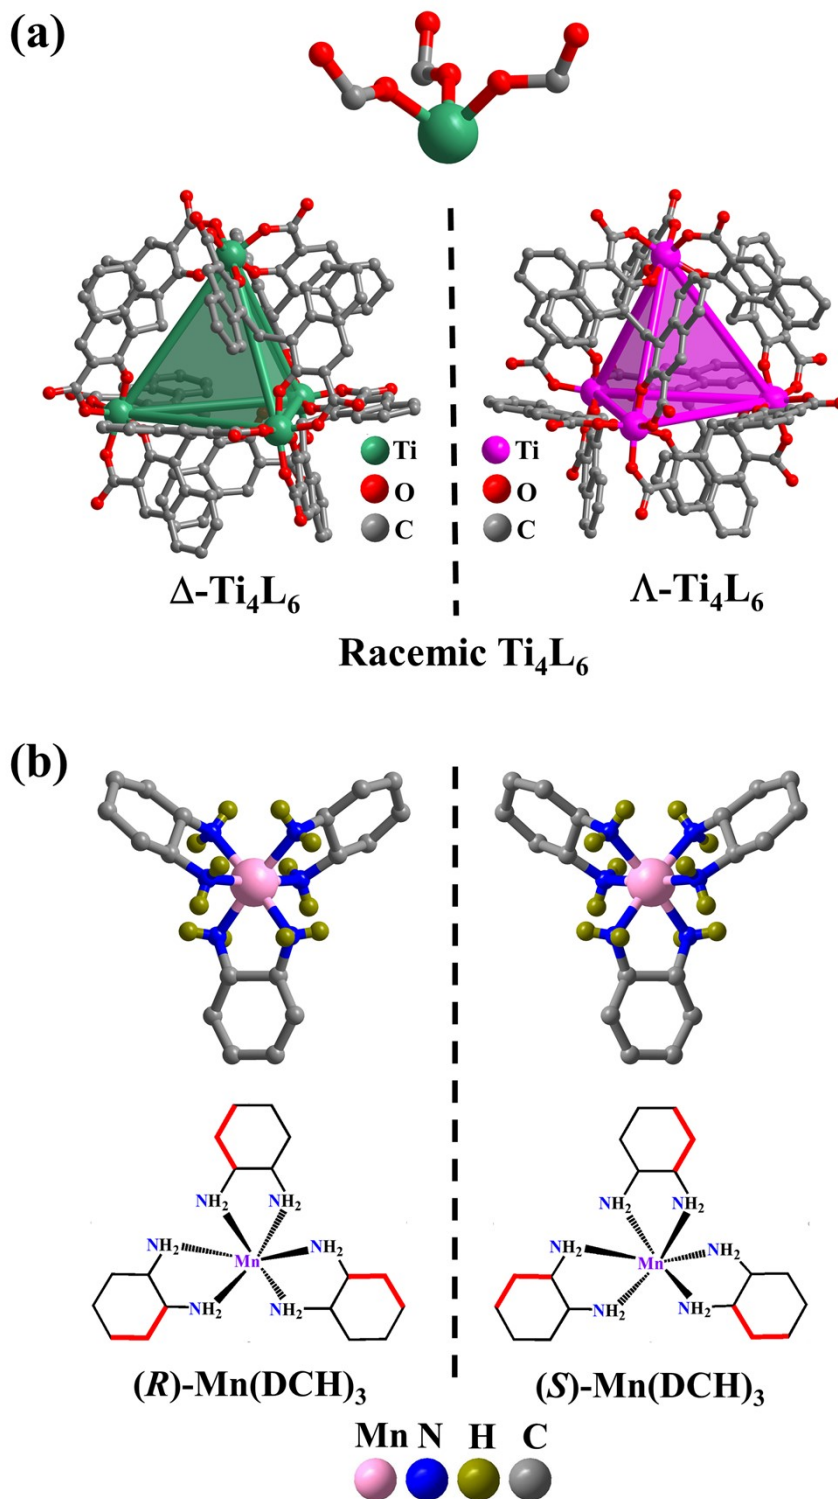

**Figure S1.** (a) Structures of the  $\Delta\text{-Ti}_4\text{L}_6$  and  $\Lambda\text{-Ti}_4\text{L}_6$  isomers in racemic  $\text{Ti}_4\text{L}_6$  cages; (b) Model structures of the (*R*)- and (*S*)-DCH (DCH = 1,2-diaminocyclohexane) units.

$\text{Ti}_4\text{L}_6$  cage with calixarene-like coordination-active vertices has many carbonyl oxygen atoms, which are not coordinated to any metal ions. Such vertex of  $\text{Ti}_4\text{L}_6$  cage looks like a claw. The Mn-complexes are positive bivalent, and the anion is the  $\text{CH}_3\text{COO}^-$ .

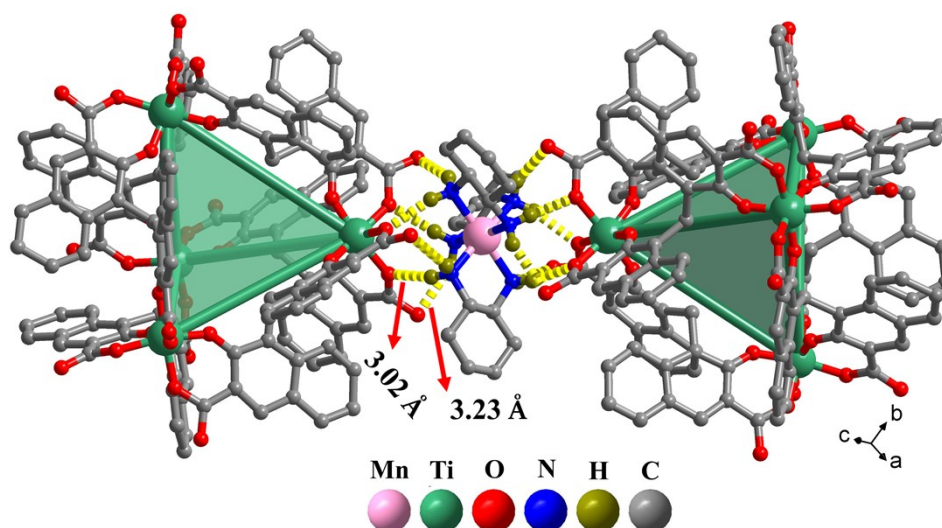

**Figure S2.** Two adjacent  $\Delta$ -Ti<sub>4</sub>L<sub>6</sub> cages linked by one (*R*)-Mn(DCH)<sub>3</sub> unit through N–H $\cdots$ O hydrogen bonds.

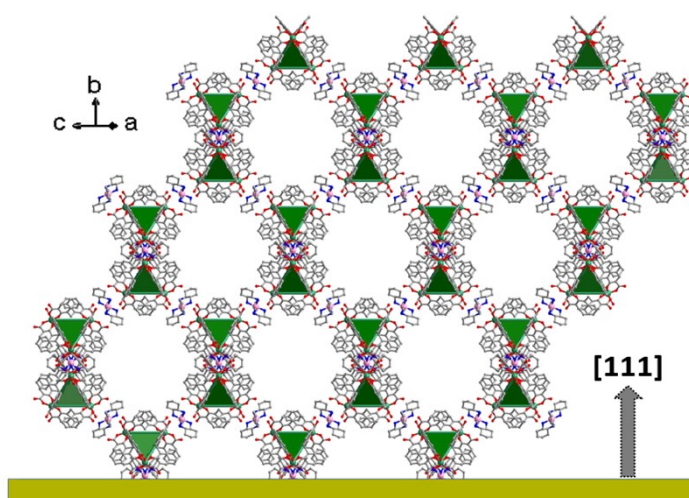

**Figure S3.** Structures of the (*R*,  $\Delta$ )-CPM film along [111] orientation.

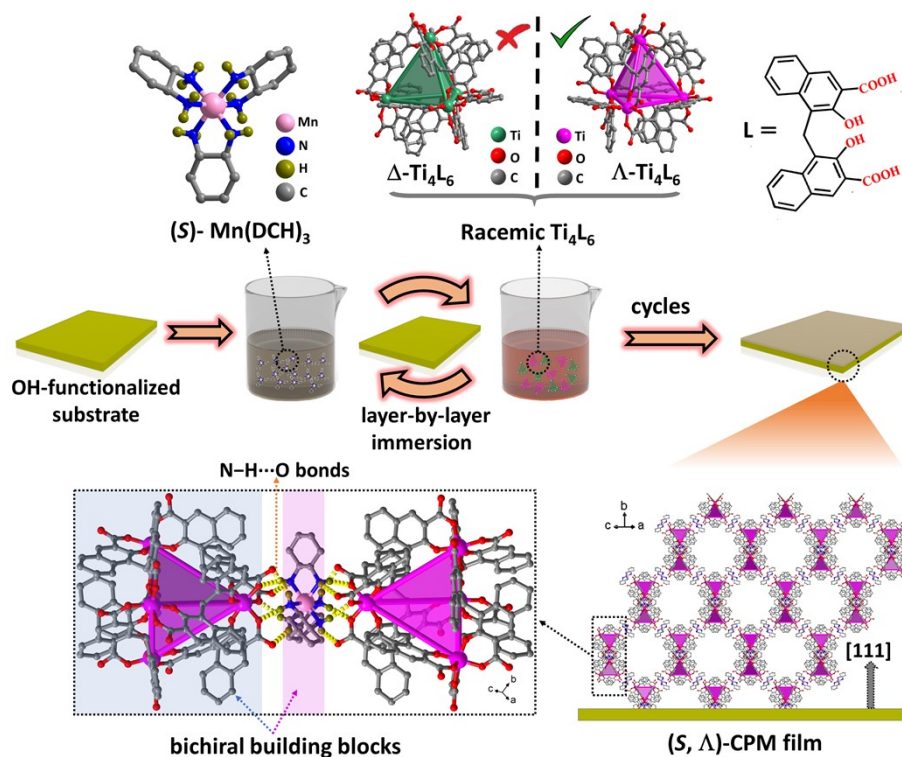

**Figure S4.** The preparation diagrammatic sketch of (S, Δ)-CPM film by the autoarm immersion layer-by-layer assembly method.

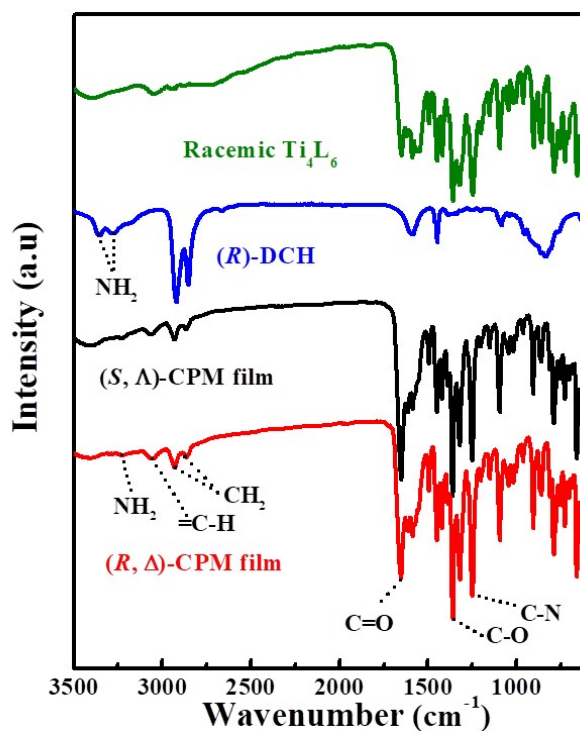

**Figure S5.** IR spectra of racemic Ti<sub>4</sub>L<sub>6</sub>, (R)-DCH, (R, Δ)- and (S, Δ)-CPM films.

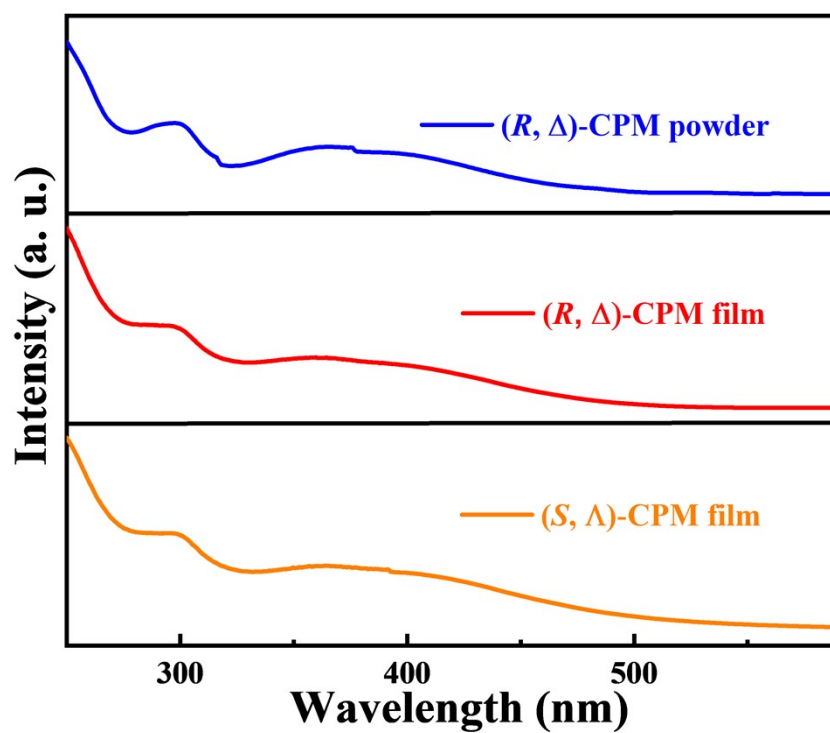

**Figure S6.** UV-vis spectra of (*R*,  $\Delta$ )- and (*S*,  $\Lambda$ )-CPM films and powder of (*R*,  $\Delta$ )-CPM.

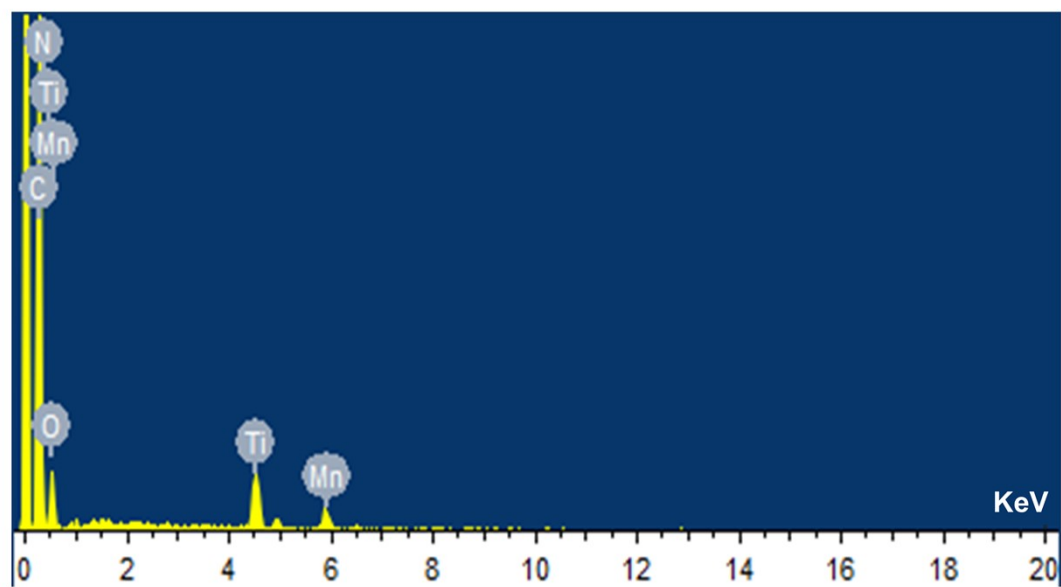

**Figure S7.** SEM EDS of (*R*,  $\Delta$ )-CPM film.

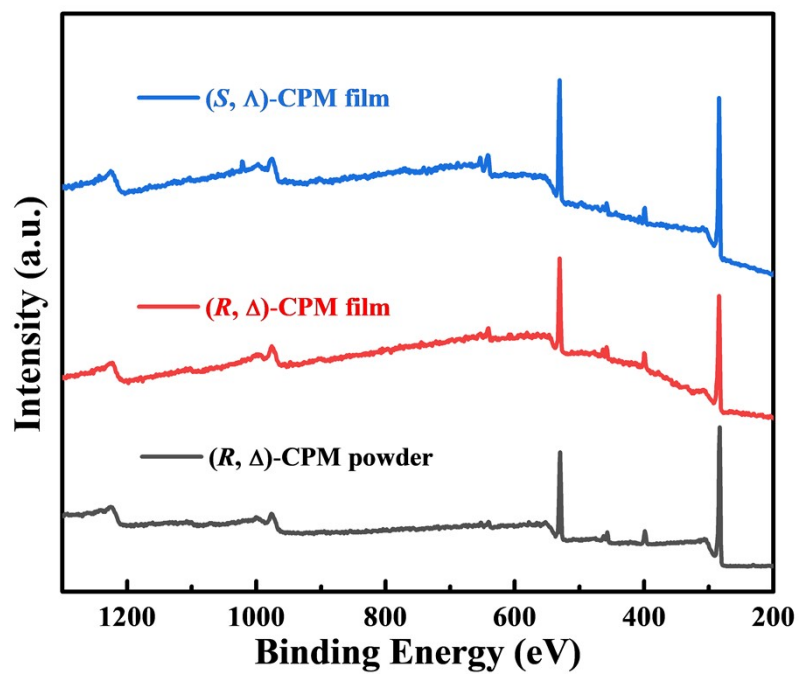

**Figure S8.** Survey XPS spectra of (*R*,  $\Delta$ )- and (*S*,  $\Lambda$ )-CPM films and powder of (*R*,  $\Delta$ )-CPM.



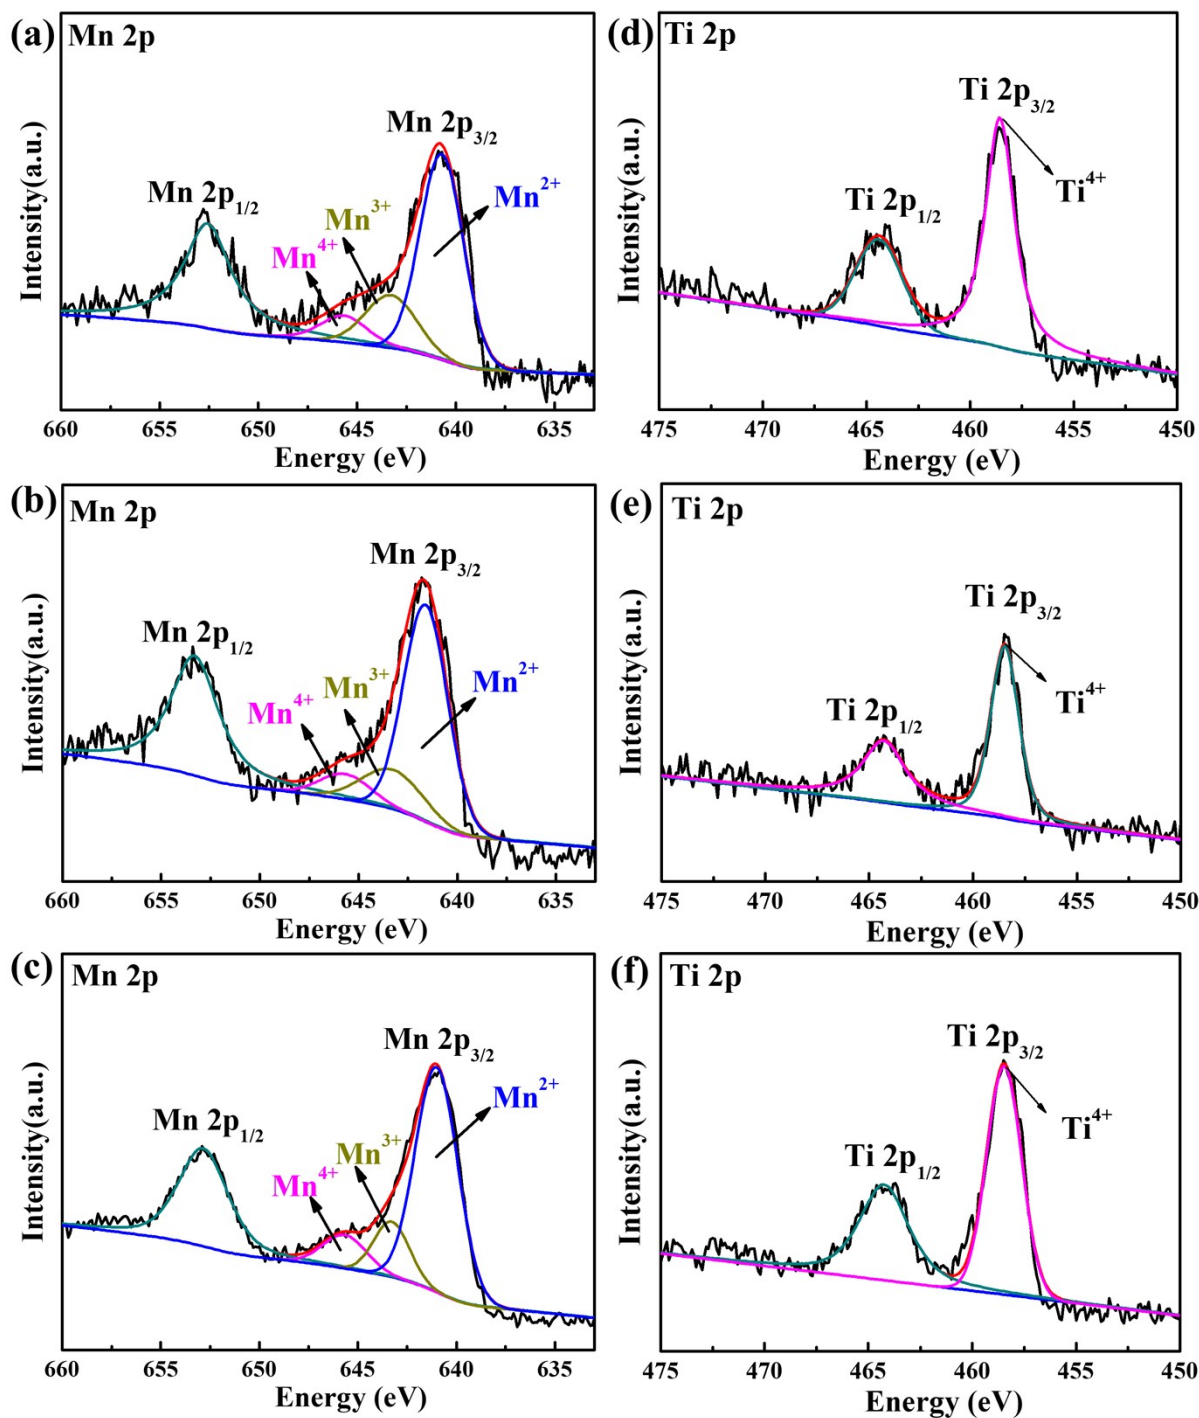

**Figure S9.** The high resolution of XPS: Mn 2p XPS spectra of (R, Δ)-CPM film (a), (S, Λ)-CPM film (b), and powder of (R, Δ)-CPM (c); Ti 2p XPS spectra of (R, Δ)-CPM film (d), (S, Λ)-CPM film (e), and powder of (R, Δ)-CPM (f).

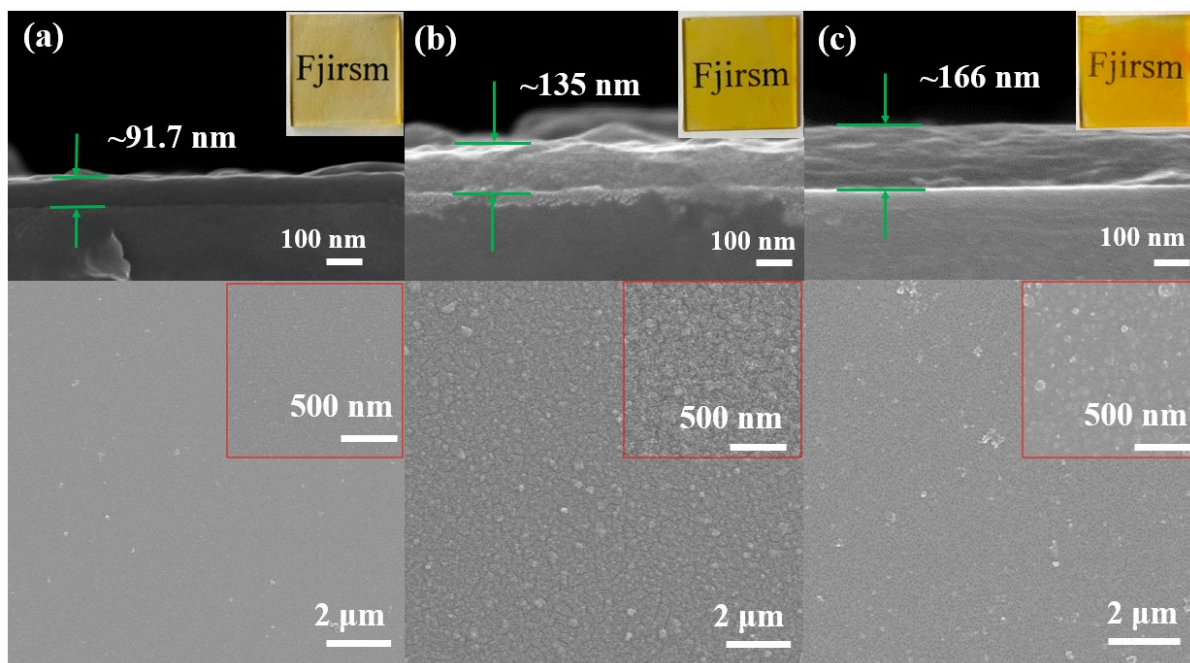

**Figure S10.** (a) Surface and cross-sectional SEM images of  $(R, \Delta)$ -CPM-20,  $(R, \Delta)$ -CPM-30 (b), and  $(R, \Delta)$ -CPM-40 (c).

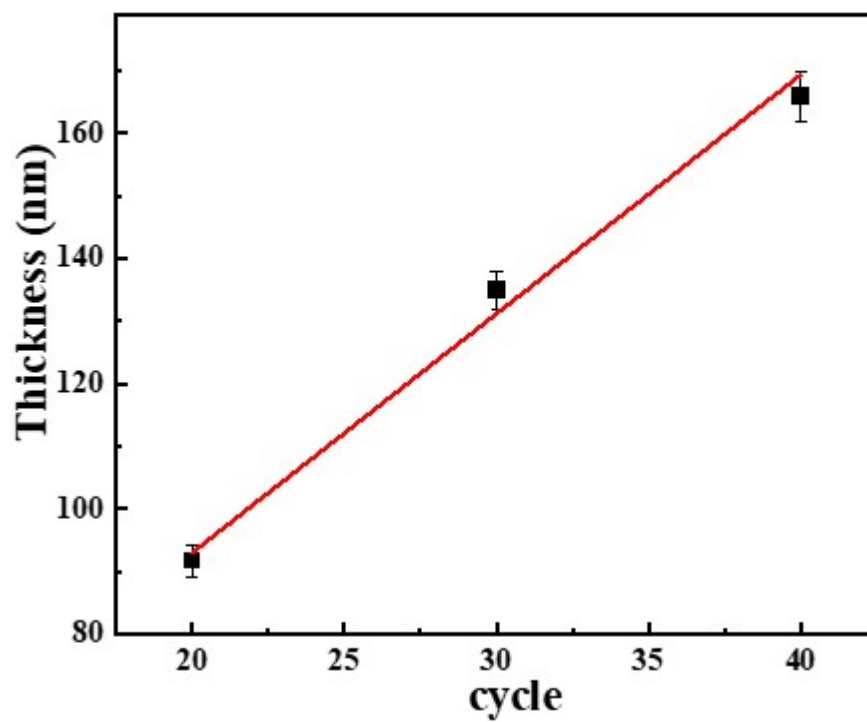

**Figure S11.** Plot of  $(R, \Delta)$ -CPM film thickness versus preparation cycles.

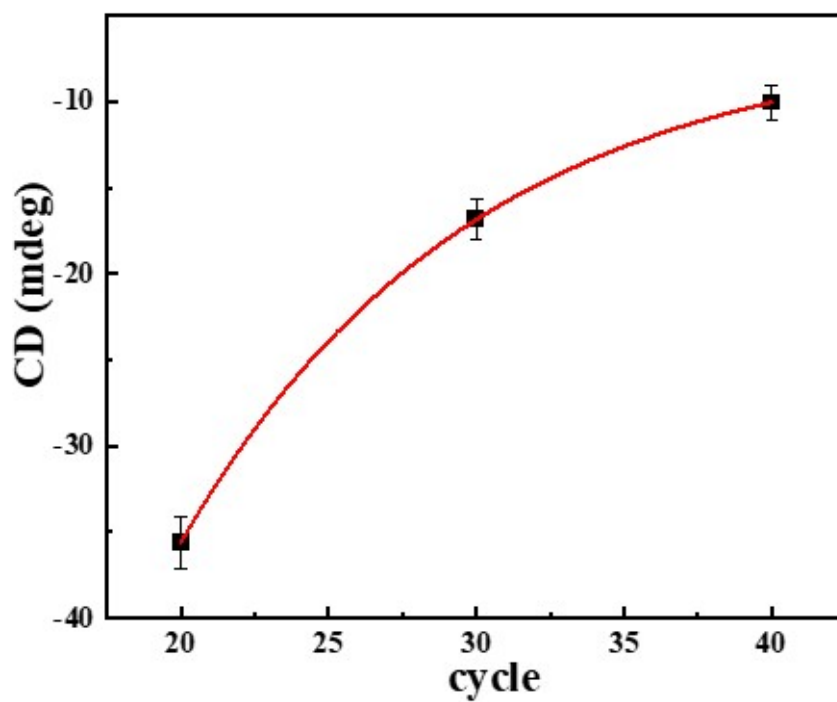

**Figure S12.** Plot of (R, Δ)-CPM film CD peak at 360 nm versus preparation cycles.

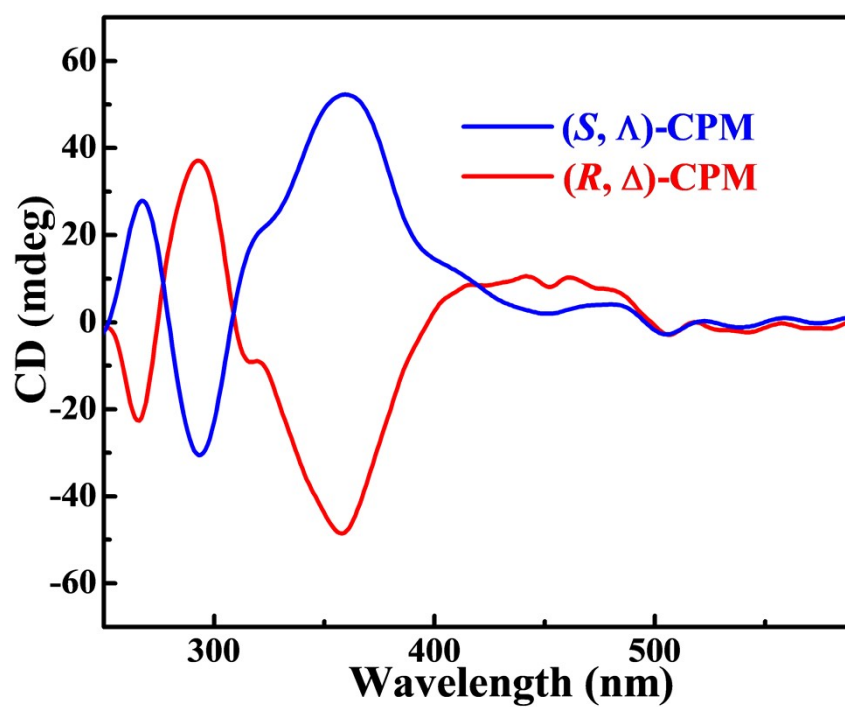

**Figure S13.** The liquid-state CD spectra of (R, Δ)- and (S, Λ)-CPM in ethanolic solution.

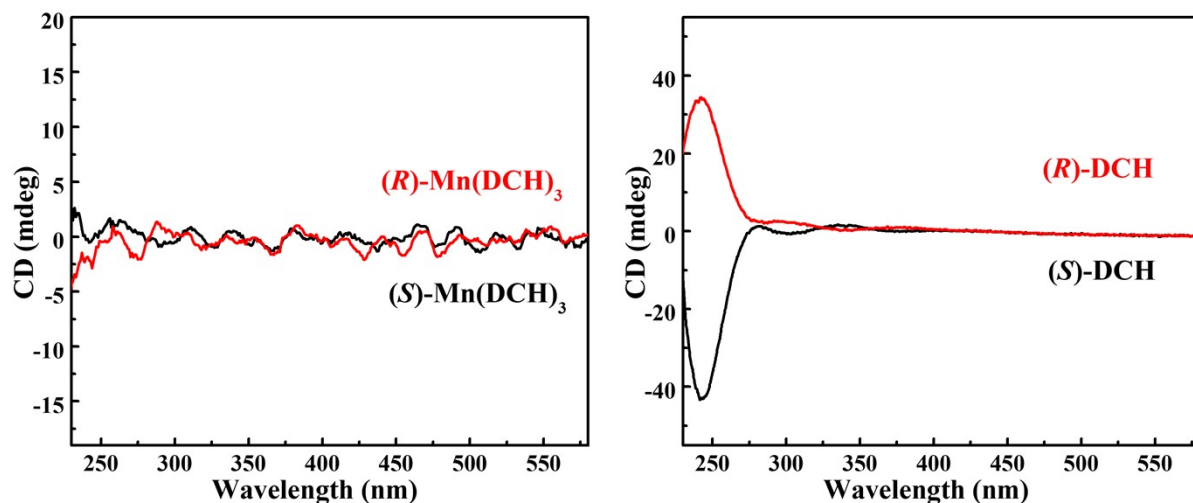

**Figure S14.** The liquid-state CD spectra of (*R*)- and (*S*)-Mn(DCH)<sub>3</sub>, (*R*)- and (*S*)-DCH in ethanolic solution.

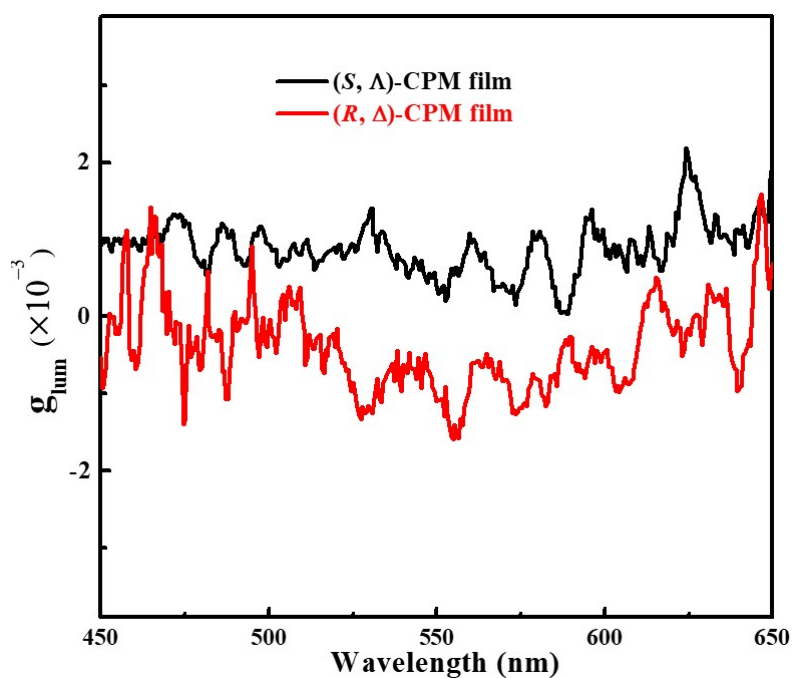

**Figure S15.** CPL dissymmetry factor ( $g_{\text{lum}}$ ) spectra of (*R*,  $\Delta$ )- and (*S*,  $\Lambda$ )-CPM films (excitation at 365 nm).

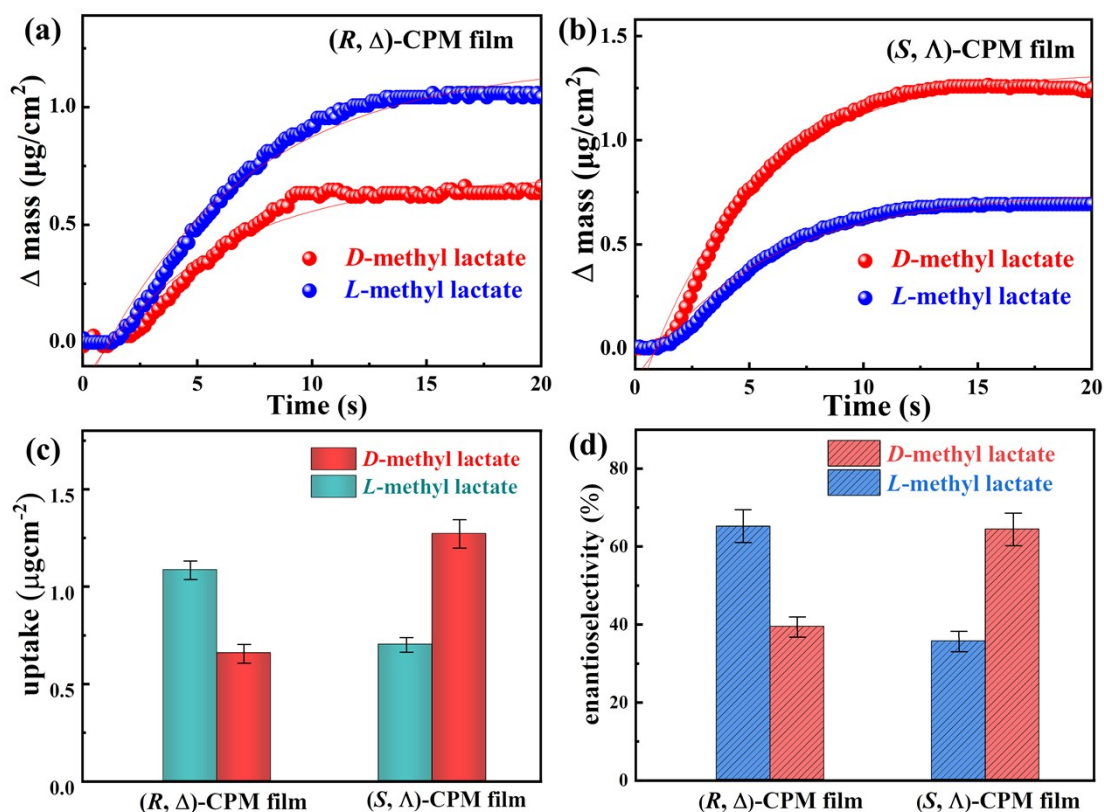

**Figure S16.** Mass uptakes of *D*- and *L*-methyl lactate in (R, Δ)- (a) and (S, Λ)-CPM films (b) using by a gas phase QCM technique; Mass uptakes (c) and enantioselectivity (d) of *D*- and *L*-methyl lactate in (R, Δ)- and (S, Λ)-CPM films.

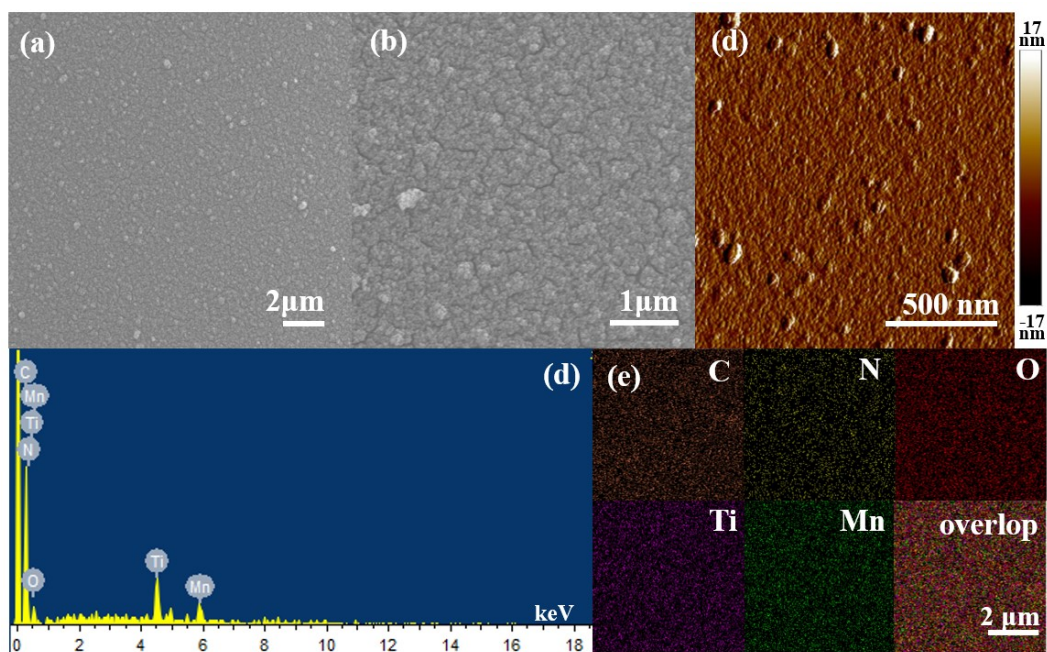

**Figure S17.** SEM images (a, b), AFM image (c), SEM EDS (d) and element mapping (e) of (S, Λ)-CPM film.



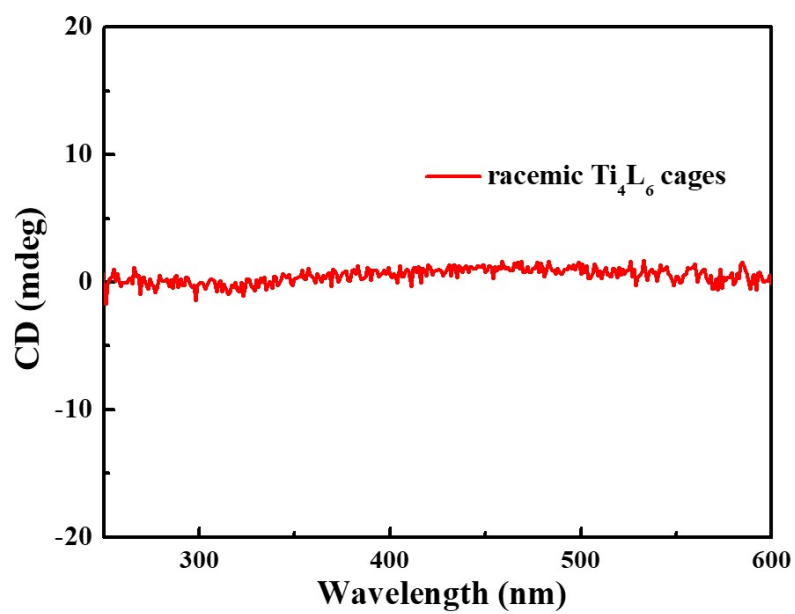

**Figure S18.** The liquid-state CD spectra of racemic  $\text{Ti}_4\text{L}_6$  cages in ethanolic solution.
